# Supplementary material
Source: publisher figshare collection journal article supplement (https://karger.figshare.com/ndownloader/files/25195274)
Supplement: Supplementary file 1 [file 25195274]

# Supplemental Figure 1. Proportions of antibiotic use (1A) and (1B) adjunctive treatment use among children hospitalized for asthma at 47 prefecture level during 2010–2018.

# Supplemental Figure 2. Proportions of antibiotic use among children aged > 5 years hospitalized for asthma at the hospital level (2A) and 47 prefecture level (2B) during 2010–2018.

# Supplemental Figure 3. Proportions of adjunctive treatment use among children aged > 5 years hospitalized for asthma at the hospital level (3A) and 47 prefecture level (3B) during 2010–2018.

# Supplemental Figure 4. Hierarchical clustering with heatmap for classification of hospitals based on antibiotic and adjunctive treatment patterns among children aged > 5 years during 2010–2018.
